# Supplementary material
Source: Elsevier journal article supplement (https://www.sciencedirect.com/science/article/pii/S1575181318300329)
Supplement: mmc1 [file S1575181318300329:mmc1.pdf]

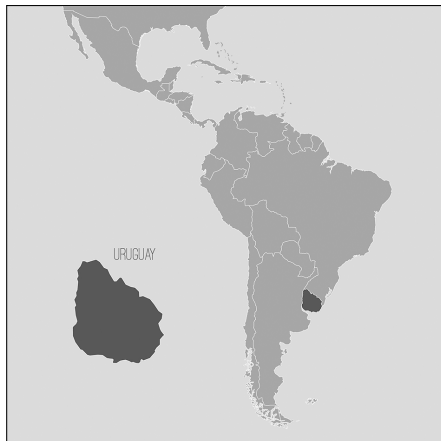

## **Anexo. República Oriental del Uruguay**

### **Datos geográficos y sanitarios**

La República Oriental del Uruguay es un país situado en América del Sur con una superficie de 176.220 km<sup>2</sup>, con 3.431.555 habitantes, cuya densidad de población es 19,47 hab/km<sup>2</sup> y su densidad poblacional médica según la OPS-OMS (2014) es de 3,74/1000 hab., con 13.197 médicos.

Para la mujer, la esperanza de vida al nacer es de 81 años, y para el varón, 73 años (OMS, 2014).

### **Escuelas de medicina**

Uruguay cuenta con dos facultades de medicina: una pública, la Facultad de Medicina de la Universidad de la República Oriental del Uruguay (UdelaR); y una privada, la Facultad de Medicina del Centro Latinoamericano de Economía Humana (Claeh). La UdelaR, fundada en 1875, cuyo ingreso es irrestricto es la que reúne el 90% de la población estudiantil.

La facultad del Claeh fue creada en 2006.

Hacia fines de 2009 la Facultad de Medicina de la UdelaR finalizó la reforma curricular, estableciendo el perfil del egresado universitario, y definió su misión como la formación científica teórico práctica, con una visión holística de la persona, que prepara médicos con una base eminentemente humanística.

El plan de estudios tiene una duración de 7 años, en 3 etapas: tres años de bases de medicina comunitaria (prevención y promoción de la salud); tres años de aprendizaje de medicina clínica (diagnóstico y tratamiento); 1 año de internado (aprendizaje práctico, con supervisión continua).

El alumno de la facultad que reúne las actividades curriculares, optativas, de investigación y extensión universitaria egresa con el título de Doctor en Medicina.

Se puede obtener un título intermedio de Técnico en Prevención y Promoción de la Salud, al finalizar el 4to. año de la carrera y la obtención de los créditos correspondientes.

### **Requisitos para ejercer la profesión**

El título obtenido en ambas universidades habilita para el ejercicio de la profesión en todo el territorio nacional.

### **Formación de postgrado**

La formación de posgrado se rige con iguales principios que el perfil del egresado universitario. Cuenta con un programa de formación en la especialidad de medicina interna, cuya institución responsable es la Escuela de Graduados que funciona en la órbita de la Facultad de Medicina de la UdelaR.

El programa tiene una duración de 4 años, bajo la modalidad del sistema de residencia. Los tres primeros años son con remuneración. El último, no.

Como los cupos son limitados, para acceder se deben aprobar dos pruebas escritas. Los mejores puntajes acceden al Postgrado Residente (remuneración los tres primeros años); los siguientes, al Postgrado No Residente (sin remuneración, con menor carga horaria).

Los médicos extranjeros pueden rendir los exámenes y acceder al postgrado, pero no al sistema de residencia remunerada.

Para obtener la especialización hay que aprobar los módulos, un proyecto de investigación y un examen final.

### **Recertificación**

Todavía no se ha implementado. Pero el Colegio Médico, apoyado por las sociedades científicas, trabaja para concretar su implementación.
